# Supplementary material for: A Central Role for RAF→MEK→ERK Signaling in the Genesis of Pancreatic Ductal Adenocarcinoma
Source: Oxford University Press journal article supplement (doi:10.1158/2159-8290.cd-11-0347), 2012-05-25
Supplement: 21598290cd110347-sup-t1_xls_43k.xls [file 21598290cd110347-sup-t1_xls_43k.xls]

## Sheet: Sheet1
Table 1: Cell Lines used in this work and their publically available genotype information. Data is from the Sanger Centre's COSMIC CGP website (http://www.sanger.ac.uk/genetics/CGP/CellLines/).
	Sanger/Cosmic	KRAS	PI3K	BRAF
2.03
2.13
5.04
6.03
10.05	y	G12D	wt	wt
ASPC-1	y	G12D	wt	wt
BxPC3	y	wt	wt	wt
CFPac1	y	G12V	wt	wt
Colo357
DAN-G
HcG25
HPAC
HPAF II	y	G12D	wt	wt
hs766T
MiaPaca2	y	G12C	wt	wt
PA-TU-8902
PA-TU-8988S
PA-TU-8988T
Panc 03.27	y	G12V	wt	wt
Panc1
SW1990	y	G12D	wt	wt
T3M4
YAPC	y	G12V	wt	wt
